# Supplementary material for: The Seed Development Factors TT2 and MYB5 Regulate Heat Stress Response in Arabidopsis
Source: MDPI journal article supplement (doi:10.3390/genes12050746), 2021-05-15
Supplement: s1 [file s1]

## Supplementary data:

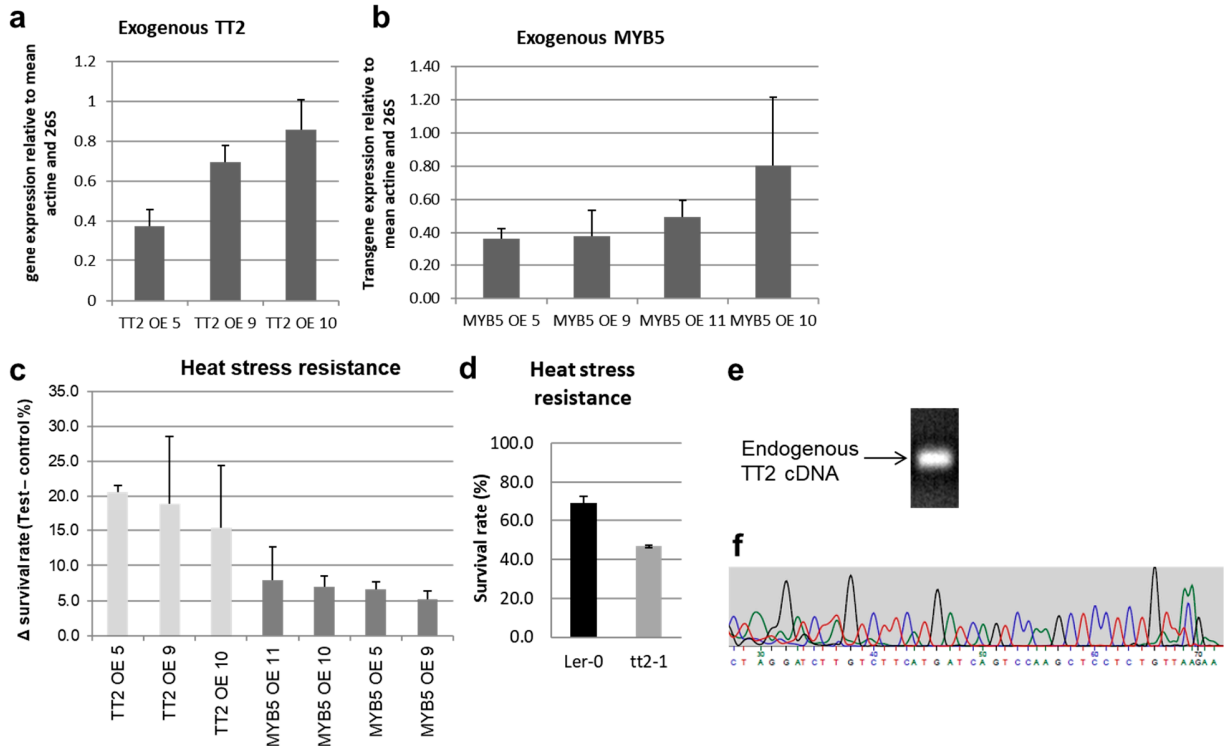

### Supplementary Figure S1: TT2 and MYB5 are involved in stress resistance in the whole plant.

**a** and **b**: Transgene expression analysis in TT2, **a**, and MYB5, **b**, overexpressing lines. Transcripts levels are expressed relative to the mean actine and 26S transcripts levels. **c**: Multiple insertions lines were tested for basal heat stress resistance (80 minutes at 44°C), over three to five independent experiments. Results are expressed as the difference between survival rate in OE lines and in the corresponding Col 0 control. Bars represent SD. The observed resistances are statistically significant with p-values <0,001 (Xhi square test). **d**: Heat stress resistance of tt2-1 mutants compared to Ler 0. Results are statistically significant with p-values <0,001 (Xhi square test). Bars represent SD. **e**: Representative picture showing Q-PCR amplification products of the TT2 mRNA in Col 0 from Fig 5 on a 2% agarose gel. An expected band around 87bp was observed every condition tested. RT-PCR was repeated and the 87bp band was purified and subjected to sanger sequencing. **f**: Portion of the chromatogram indicating the QPCR product dosed in Fig 5 was TT2 mRNA.

**Supplementary Table S1:** Primer used for prey cloning. Att recombination sequence are presented in lower cases

| Primer name | Primer sequence (5'→ 3')                                 |
|-------------|----------------------------------------------------------|
| AT5G35550-f | ggggacaagttgtacaaaaagcaggctacATGGGAAAGAGAGCAACTACTAGTG   |
| AT5G35550-r | ggggaccactttgtacaagaaagctgggtgTCAACAAGTGAAGTCTCGGAG      |
| AT3G13540-f | ggggacaagttgtacaaaaagcaggctacATGATGTCATGTGGTGGGAA        |
| AT3G13540-r | ggggaccactttgtacaagaaagctgggtgCTAGTCATGTCCTAAGCTAGAAGACG |

**Supplementary Table S2:** Primer used Q-PCR.

| <b>Primer name</b> | <b>Primer sequence (5'→ 3')</b> |
|--------------------|---------------------------------|
| AT1G61720-F        | ACATTTGCTGTGCTTACAACACAAGT      |
| AT1G61720-R        | CGAAAGCCTTCATTGATAAGTTTTGCG     |
| AT2G26150-F        | TCCTTCCACGTTACTTCAAGC           |
| AT2G26150-R        | CATCCCAGATCCTTGCTGAT            |
| AT3G18780-F        | CGTTTCTATGATGCACTTGTGTG         |
| AT3G18780-R        | GGAACAAAAGGAATAAAGAGG           |
| AT4G24820-F        | TACCGTTCGGAGTTTCCAAG            |
| AT4G24820-R        | AGGTTGCAGGTGTTTGGAG             |
| AT4G22880-F        | AATTGGCTAACAACGCGAGTG           |
| AT4G22880-R        | CGTACTCACTCGTTGCTTCTATGTA       |
| AT5G35550-F        | AACAGAGGAGCTTGGACTGA            |
| AT5G35550-R        | AGGGAGAGTGCTCCATTTC             |
| AT1G13750-F        | CCCTCTTCCTTGACCAATTACT          |
| AT1G13750-R        | TTTAGCCCAGCTCTTACAGGA           |
| AT5G42800-F        | GAACGAGGCGCATTACTC              |
| AT5G42800-R        | TTGAAGGTACGTTATATTCGGG          |
| AT4G09820-F        | GCCATCCACCAAGTCATAATAC          |
| AT4G09820-R        | TTTATATGTTGCATCCGGCTAT          |
| 35S-terminator-F   | AGTGGTTGATAACAGCGGGT            |
| 35S-terminator-R   | GCAGCGTAATCTGGAACGTC            |

**Supplementary Table S3:** List of genes strongly coregulated with HSFA2 during heat, cold, hypoxia and salt stresses. Known HSFA2 targets are presented in red (according to <sup>9</sup>).

| Array Element | Locus                   | Gene description                                                                                                          |
|---------------|-------------------------|---------------------------------------------------------------------------------------------------------------------------|
| 263164_at     | AT1G03070               | Glutamate binding /                                                                                                       |
| 261838_at     | AT1G16030               | HSP70B (heat shock protein 70B); ATP binding                                                                              |
| 260881_at     | AT1G21550               | Calcium-binding protein, putative                                                                                         |
| 260025_at     | AT1G30070               | SGS domain-containing protein                                                                                             |
| 262014_at     | AT1G35660               | Erythroid differentiation factor-like protein                                                                             |
| 262148_at     | AT1G52560               | 26.5 kDa class I small heat shock protein-like (HSP26.5-P)                                                                |
| 260978_at     | AT1G53540               | 17.6 kDa class I small heat shock protein (HSP17.6C-CI) (AA 1-156)                                                        |
| 263150_at     | AT1G54050               | 17.4 kDa class III heat shock protein (HSP17.4-CIII)                                                                      |
| 262911_s_at   | AT1G59860;<br>AT1G07400 | AT1G59860, 17.6 kDa class I heat shock protein (HSP17.6A-CI); AT1G07400, 17.8 kDa class I heat shock protein (HSP17.8-CI) |
| 256518_at     | AT1G66080               | Similar to hypothetical protein [Vitis vinifera] (GB:CAN77663.1)                                                          |
| 256363_at     | AT1G66510               | AAR2 protein family                                                                                                       |
| 259913_at     | AT1G72660               | Developmentally regulated GTP-binding protein, putative                                                                   |
| 260248_at     | AT1G74310               | ATHSP101 (HEAT SHOCK PROTEIN 101); ATP binding / ATPase                                                                   |
| 263374_at     | AT2G20560               | DNAJ heat shock family protein                                                                                            |
| 264402_at     | AT2G25140               | CLPB-M/CLPB4/HSP98.7 (HEAT SHOCK PROTEIN 98.7); ATP binding / ATPase                                                      |
| 266294_at     | AT2G29500               | 17.6 kDa class I small heat shock protein (HSP17.6B-CI)                                                                   |
| 265675_at     | AT2G32120               | HSP70T-2; ATP binding                                                                                                     |
| 267073_at     | AT2G41160               | Ubiquitin-associated (UBA)/TS-N domain-containing protein                                                                 |
| 266590_at     | AT2G46240               | BAG6 (ARABIDOPSIS THALIANA BCL-2-ASSOCIATED ATHANOGENE 6)                                                                 |
| 258830_at     | AT3G07090               | Similar to unknown protein [Arabidopsis thaliana] (TAIR:AT5G25170.1)                                                      |
| 258827_at     | AT3G07150               | Similar to hypothetical protein [Vitis vinifera] (GB:CAN68821.1)                                                          |
| 258984_at     | AT3G08970               | DNAJ heat shock N-terminal domain-containing protein                                                                      |
| 259037_at     | AT3G09350               | Armadillo/beta-catenin repeat family protein                                                                              |
| 258695_at     | AT3G09640               | APX2 (ASCORBATE PEROXIDASE 2); L-ascorbate peroxidase                                                                     |
| 256663_at     | AT3G12050               | Aha1 domain-containing protein                                                                                            |
| 252515_at     | AT3G46230               | ATHSP17.4 (Arabidopsis thaliana heat shock protein 17.4)                                                                  |
| 251166_at     | AT3G63350               | AT-HSFA7B (Arabidopsis thaliana heat shock transcription factor A7B)                                                      |
| 254878_at     | AT4G11660               | AT-HSFB2B (Arabidopsis thaliana heat shock transcription factor B2B); transcription factor                                |
| 254839_at     | AT4G12400               | Stress-inducible protein, putative                                                                                        |
| 245272_at     | AT4G17250               | Similar to unknown protein [Arabidopsis thaliana] (TAIR:AT5G47580.1)                                                      |
| 254059_at     | AT4G25200               | ATHSP23.6-MITO (MITOCHONDRION-LOCALIZED SMALL HEAT SHOCK PROTEIN 23.6)                                                    |
| 253884_at     | AT4G27670               | HSP21 (HEAT SHOCK PROTEIN 21)                                                                                             |
| 250296_at     | AT5G12020               | HSP17.6II (17.6 KDA CLASS II HEAT SHOCK PROTEIN)                                                                          |
| 250351_at     | AT5G12030               | AT-HSP17.6A (Arabidopsis thaliana heat shock protein 17.6A)                                                               |
| 250036_at     | AT5G18340               | U-box domain-containing protein                                                                                           |
| 246944_at     | AT5G25450               | Ubiquinol-cytochrome C reductase complex 14 kDa protein, putative                                                         |
| 246612_at     | AT5G35320               | Similar to hypothetical protein [Vitis vinifera] (GB:CAN60849.1)                                                          |
| 249575_at     | AT5G37670               | 15.7 kDa class I-related small heat shock protein-like (HSP15.7-CI)                                                       |

**Supplementary Table S3 (continued):**

| <b>Array Element</b> | <b>Locus</b> | <b>Gene description</b>                                                                      |
|----------------------|--------------|----------------------------------------------------------------------------------------------|
| 248774_at            | AT5G47830    | Similar to hypothetical protein MtrDRAFT_AC150207g26v2 [Medicago truncatula] (GB:ABD32636.1) |
| 248657_at            | AT5G48570    | Peptidyl-prolyl cis-trans isomerase, putative / FK506-binding protein, putative              |
| 248434_at            | AT5G51440    | 23.5 kDa mitochondrial small heat shock protein (HSP23.5-M)                                  |
| 248332_at            | AT5G52640    | HSP81-1 (HEAT SHOCK PROTEIN 81-1); ATP binding / unfolded protein binding                    |
| 254414_at            | no_match     | no_match                                                                                     |

**Supplementary Table S5: GO term enriched in TT2OE upregulated genes.**

| <b>GO term</b> | <b>Description</b>                | <b>Number of genes</b> | <b>%</b> | <b>FDR-adjusted p-value</b> |
|----------------|-----------------------------------|------------------------|----------|-----------------------------|
| GO:0050896     | response to stimulus              | 80                     | 21.3     | 4.2e-07                     |
| GO:0006950     | response to stress                | 53                     | 14.1     | 2.5e-06                     |
| GO:0010876     | lipid localization                | 5                      | 1.3      | 0.00098                     |
| GO:0019748     | secondary metabolic process       | 17                     | 4.5      | 0.0011                      |
| GO:0046283     | anthocyanin metabolic process     | 5                      | 1.3      | 0.002                       |
| GO:0006979     | response to oxidative stress      | 13                     | 3.5      | 0.0031                      |
| GO:0009725     | response to hormone stimulus      | 23                     | 6.1      | 0.0085                      |
| GO:0009812     | flavonoid metabolic process       | 6                      | 1.6      | 0.0089                      |
| GO:0009628     | response to abiotic stimulus      | 30                     | 8        | 0.0089                      |
| GO:0009743     | response to carbohydrate stimulus | 10                     | 2.7      | 0.0089                      |
| GO:0006952     | defense response                  | 19                     | 5.1      | 0.012                       |
| GO:0009408     | response to heat                  | 8                      | 2.1      | 0.012                       |

**Supplementary Table S6: GO terms enriched in TT2OE downregulated genes.**

| <b>GO term</b> | <b>Description</b>                                   | <b>Number of genes</b> | <b>%</b> | <b>FDR-adjusted p-value</b> |
|----------------|------------------------------------------------------|------------------------|----------|-----------------------------|
| GO:0010876     | lipid localization                                   | 6                      | 1.9      | 7.1e-05                     |
| GO:0019748     | secondary metabolic process                          | 17                     | 5.5      | 0.0002                      |
| GO:0009698     | phenylpropanoid metabolic process                    | 10                     | 3.2      | 0.00047                     |
| GO:0009607     | response to biotic stimulus                          | 16                     | 5.2      | 0.006                       |
| GO:0051704     | multi-organism process                               | 17                     | 5.5      | 0.013                       |
| GO:0006950     | response to stress                                   | 35                     | 11.4     | 0.013                       |
| GO:0051707     | response to other organism                           | 14                     | 4.5      | 0.022                       |
| GO:0006519     | cellular amino acid and derivative metabolic process | 15                     | 4.9      | 0.022                       |
| GO:0050896     | response to stimulus                                 | 51                     | 16.6     | 0.025                       |

**Supplementary Table S8:** GO term enrichment in upregulated GRN “response to stress”.

| GO term    | Description                         | Number of gene | %    | FDR adjusted p-value |
|------------|-------------------------------------|----------------|------|----------------------|
| GO:0006950 | response to stress                  | 65             | 92,9 | 1.4e-69              |
| GO:0050896 | response to stimulus                | 65             | 92,9 | 2.3e-54              |
| GO:0009628 | response to abiotic stimulus        | 39             | 55,7 | 4.9e-34              |
| GO:0009408 | response to heat                    | 22             | 31,4 | 2.2e-32              |
| GO:0042221 | response to chemical stimulus       | 41             | 58,6 | 2.4e-31              |
| GO:0009266 | response to temperature stimulus    | 27             | 38,6 | 1.2e-30              |
| GO:0006979 | response to oxidative stress        | 21             | 30,0 | 1.8e-24              |
| GO:0010035 | response to inorganic substance     | 20             | 28,6 | 2.7e-24              |
| GO:0009642 | response to light intensity         | 14             | 20,0 | 4.2e-21              |
| GO:0042542 | response to hydrogen peroxide       | 12             | 17,1 | 8.8e-20              |
| GO:0009644 | response to high light intensity    | 12             | 17,1 | 1.7e-19              |
| GO:0000302 | response to reactive oxygen species | 12             | 17,1 | 1.2e-17              |
| GO:0006952 | defense response                    | 18             | 25,7 | 1.1e-13              |
| GO:0010033 | response to organic substance       | 20             | 28,6 | 9.4e-12              |
| GO:0009416 | response to light stimulus          | 15             | 21,4 | 9.4e-12              |
| GO:0009314 | response to radiation               | 15             | 21,4 | 1.3e-11              |
| GO:0009607 | response to biotic stimulus         | 13             | 18,6 | 4.6e-09              |
| GO:0009719 | response to endogenous stimulus     | 15             | 21,4 | 2.4e-08              |
| GO:0009725 | response to hormone stimulus        | 13             | 18,6 | 6.6e-07              |
| GO:0009723 | response to ethylene stimulus       | 7              | 10,0 | 2.3e-06              |
| GO:0009605 | response to external stimulus       | 9              | 12,9 | 2.3e-06              |
| GO:0051707 | response to other organism          | 10             | 14,3 | 3.3e-06              |
| GO:0010038 | response to metal ion               | 7              | 10,0 | 6.4e-06              |
| GO:0009617 | response to bacterium               | 7              | 10,0 | 7.8e-06              |
| GO:0006970 | response to osmotic stress          | 8              | 11,4 | 1.7e-05              |
| GO:0046686 | response to cadmium ion             | 6              | 8,6  | 1.9e-05              |
| GO:0051704 | multi-organism process              | 10             | 14,3 | 2.7e-05              |
| GO:0009751 | response to salicylic acid stimulus | 6              | 8,6  | 3.4e-05              |
| GO:0009753 | response to jasmonic acid stimulus  | 6              | 8,6  | 4.9e-05              |
| GO:0006955 | immune response                     | 7              | 10,0 | 7.7e-05              |
| GO:0009651 | response to salt stress             | 7              | 10,0 | 7.7e-05              |
| GO:0002376 | immune system process               | 7              | 10,0 | 7.7e-05              |
| GO:0009743 | response to carbohydrate stimulus   | 6              | 8,6  | 7.9e-05              |
| GO:0009737 | response to abscisic acid stimulus  | 7              | 10,0 | 8.6e-05              |

**Supplementary Table S8 (continued):**

| <b>GO term</b> | <b>Description</b>                       | <b>Number of gene</b> | <b>%</b> | <b>FDR adjusted p-value</b> |
|----------------|------------------------------------------|-----------------------|----------|-----------------------------|
| GO:0042742     | defense response to bacterium            | 5                     | 7,1      | 0.00026                     |
| GO:0050789     | regulation of biological process         | 19                    | 27,1     | 0.00034                     |
| GO:0009611     | response to wounding                     | 5                     | 7,1      | 0.00039                     |
| GO:0009409     | response to cold                         | 6                     | 8,6      | 0.00039                     |
| GO:0045087     | innate immune response                   | 6                     | 8,6      | 0.00051                     |
| GO:0065007     | biological regulation                    | 20                    | 28,6     | 0.00051                     |
| GO:0009415     | response to water                        | 5                     | 7,1      | 0.00091                     |
| GO:0050794     | regulation of cellular process           | 17                    | 24,3     | 0.0011                      |
| GO:0006457     | protein folding                          | 5                     | 7,1      | 0.0016                      |
| GO:0051716     | cellular response to stimulus            | 7                     | 10,0     | 0.0088                      |
| GO:0007165     | signal transduction                      | 8                     | 11,4     | 0.018                       |
| GO:0080090     | regulation of primary metabolic process  | 10                    | 14,3     | 0.027                       |
| GO:0031323     | regulation of cellular metabolic process | 10                    | 14,3     | 0.036                       |



**Supplementary Table S9:** GO term enrichment in upregulated GRN “secondary metabolic process”.

| GO term    | Description                                          | Number of gene | %    | FDR adjusted p-value |
|------------|------------------------------------------------------|----------------|------|----------------------|
| GO:0019748 | secondary metabolic process                          | 32             | 86,5 | 7.2e-53              |
| GO:0009404 | toxin metabolic process                              | 11             | 29,7 | 5.8e-21              |
| GO:0009407 | toxin catabolic process                              | 11             | 29,7 | 5.8e-21              |
| GO:0044237 | cellular metabolic process                           | 34             | 91,9 | 3.5e-17              |
| GO:0009698 | phenylpropanoid metabolic process                    | 11             | 29,7 | 7.5e-16              |
| GO:0009699 | phenylpropanoid biosynthetic process                 | 10             | 27,0 | 6.5e-15              |
| GO:0008152 | metabolic process                                    | 34             | 91,9 | 1.3e-14              |
| GO:0009987 | cellular process                                     | 34             | 91,9 | 2.3e-13              |
| GO:0006575 | cellular amino acid derivative metabolic process     | 11             | 29,7 | 2.3e-13              |
| GO:0009812 | flavonoid metabolic process                          | 8              | 21,6 | 3,00E-13             |
| GO:0042398 | cellular amino acid derivative biosynthetic process  | 10             | 27,0 | 4.4e-13              |
| GO:0019438 | aromatic compound biosynthetic process               | 10             | 27,0 | 4.7e-13              |
| GO:0006725 | cellular aromatic compound metabolic process         | 11             | 29,7 | 1.8e-12              |
| GO:0009813 | flavonoid biosynthetic process                       | 7              | 18,9 | 1.1e-11              |
| GO:0044248 | cellular catabolic process                           | 12             | 32,4 | 4.9e-11              |
| GO:0006519 | cellular amino acid and derivative metabolic process | 11             | 29,7 | 4,00E-10             |
| GO:0006722 | triterpenoid metabolic process                       | 5              | 13,5 | 4.2e-10              |
| GO:0006721 | terpenoid metabolic process                          | 7              | 18,9 | 4.8e-10              |
| GO:0046283 | anthocyanin metabolic process                        | 5              | 13,5 | 1.8e-09              |
| GO:0006720 | isoprenoid metabolic process                         | 7              | 18,9 | 3,00E-09             |
| GO:0009056 | catabolic process                                    | 12             | 32,4 | 2,00E-08             |
| GO:0042440 | pigment metabolic process                            | 6              | 16,2 | 3.6e-08              |
| GO:0009411 | response to UV                                       | 5              | 13,5 | 1.7e-07              |
| GO:0044249 | cellular biosynthetic process                        | 19             | 51,4 | 1.8e-07              |
| GO:0016114 | terpenoid biosynthetic process                       | 5              | 13,5 | 2.9e-07              |
| GO:0009058 | biosynthetic process                                 | 19             | 51,4 | 3,00E-07             |
| GO:0046148 | pigment biosynthetic process                         | 5              | 13,5 | 6.2e-07              |
| GO:0008299 | isoprenoid biosynthetic process                      | 5              | 13,5 | 1.5e-06              |
| GO:0044255 | cellular lipid metabolic process                     | 7              | 18,9 | 1.2e-05              |
| GO:0044238 | primary metabolic process                            | 22             | 59,5 | 2.1e-05              |
| GO:0009628 | response to abiotic stimulus                         | 9              | 24,3 | 5,00E-05             |
| GO:0006629 | lipid metabolic process                              | 7              | 18,9 | 8,00E-05             |
| GO:0008610 | lipid biosynthetic process                           | 5              | 13,5 | 0.00034              |

**Supplementary Table S9 (continued):**

| <b>GO term</b> | <b>Description</b>            | <b>Number of gene</b> | <b>%</b> | <b>FDR adjusted p-value</b> |
|----------------|-------------------------------|-----------------------|----------|-----------------------------|
| GO:0050896     | response to stimulus          | 13                    | 35,1     | 0.00035                     |
| GO:0009416     | response to light stimulus    | 5                     | 13,5     | 0.0013                      |
| GO:0009314     | response to radiation         | 5                     | 13,5     | 0.0014                      |
| GO:0042221     | response to chemical stimulus | 8                     | 21,6     | 0.0034                      |
| GO:0006950     | response to stress            | 8                     | 21,6     | 0.0067                      |

**Supplementary Table S10:** GO term enrichment in downregulated GRN “response to stress”.

| GO term    | Description                                          | Number of gene | %    | FDR adjusted p-value |
|------------|------------------------------------------------------|----------------|------|----------------------|
| GO:0006950 | response to stress                                   | 42             | 87,5 | 3.2e-43              |
| GO:0050896 | response to stimulus                                 | 42             | 87,5 | 1.7e-33              |
| GO:0006952 | defense response                                     | 16             | 33,3 | 4.1e-14              |
| GO:0006979 | response to oxidative stress                         | 12             | 25,0 | 4,00E-13             |
| GO:0042221 | response to chemical stimulus                        | 20             | 41,7 | 5.3e-12              |
| GO:0009607 | response to biotic stimulus                          | 13             | 27,1 | 2.2e-11              |
| GO:0009611 | response to wounding                                 | 9              | 18,8 | 9,00E-11             |
| GO:0009605 | response to external stimulus                        | 11             | 22,9 | 1.1e-10              |
| GO:0051707 | response to other organism                           | 11             | 22,9 | 3.1e-09              |
| GO:0051704 | multi-organism process                               | 11             | 22,9 | 4.1e-08              |
| GO:0009628 | response to abiotic stimulus                         | 13             | 27,1 | 2.8e-07              |
| GO:0009620 | response to fungus                                   | 6              | 12,5 | 7.3e-07              |
| GO:0009698 | phenylpropanoid metabolic process                    | 6              | 12,5 | 1.2e-06              |
| GO:0009409 | response to cold                                     | 7              | 14,6 | 2.1e-06              |
| GO:0009266 | response to temperature stimulus                     | 7              | 14,6 | 2.5e-05              |
| GO:0006575 | cellular amino acid derivative metabolic process     | 6              | 12,5 | 2.8e-05              |
| GO:0006631 | fatty acid metabolic process                         | 5              | 10,4 | 9.1e-05              |
| GO:0006725 | cellular aromatic compound metabolic process         | 6              | 12,5 | 9.3e-05              |
| GO:0019748 | secondary metabolic process                          | 6              | 12,5 | 0.00027              |
| GO:0032787 | monocarboxylic acid metabolic process                | 5              | 10,4 | 0.0012               |
| GO:0006970 | response to osmotic stress                           | 5              | 10,4 | 0.0012               |
| GO:0006519 | cellular amino acid and derivative metabolic process | 6              | 12,5 | 0.0014               |
| GO:0044255 | cellular lipid metabolic process                     | 5              | 10,4 | 0.007                |
| GO:0010033 | response to organic substance                        | 7              | 14,6 | 0.0085               |
| GO:0019752 | carboxylic acid metabolic process                    | 5              | 10,4 | 0.024                |
| GO:0006082 | organic acid metabolic process                       | 5              | 10,4 | 0.024                |
| GO:0006629 | lipid metabolic process                              | 5              | 10,4 | 0.024                |
| GO:0043436 | oxoacid metabolic process                            | 5              | 10,4 | 0.024                |
| GO:0042180 | cellular ketone metabolic process                    | 5              | 10,4 | 0.026                |

**Supplementary Table S11:** GO term enrichment in downregulated GRN “secondary metabolic process”.

| GO term    | Description                                          | Number of gene | %    | FDR adjusted p-value |
|------------|------------------------------------------------------|----------------|------|----------------------|
| GO:0019748 | secondary metabolic process                          | 26             | 70,3 | 4.2e-39              |
| GO:0009698 | phenylpropanoid metabolic process                    | 17             | 45,9 | 2.2e-28              |
| GO:0009699 | phenylpropanoid biosynthetic process                 | 15             | 40,5 | 1.7e-25              |
| GO:0006575 | cellular amino acid derivative metabolic process     | 17             | 45,9 | 1.5e-24              |
| GO:0006725 | cellular aromatic compound metabolic process         | 17             | 45,9 | 6,00E-23             |
| GO:0042398 | cellular amino acid derivative biosynthetic process  | 15             | 40,5 | 1.1e-22              |
| GO:0019438 | aromatic compound biosynthetic process               | 15             | 40,5 | 1.2e-22              |
| GO:0006519 | cellular amino acid and derivative metabolic process | 17             | 45,9 | 2.5e-19              |
| GO:0009813 | flavonoid biosynthetic process                       | 7              | 18,9 | 1,00E-11             |
| GO:0009812 | flavonoid metabolic process                          | 7              | 18,9 | 2.1e-11              |
| GO:0009407 | toxin catabolic process                              | 6              | 16,2 | 2,00E-10             |
| GO:0009404 | toxin metabolic process                              | 6              | 16,2 | 2,00E-10             |
| GO:0044237 | cellular metabolic process                           | 26             | 70,3 | 5.3e-09              |
| GO:0009611 | response to wounding                                 | 7              | 18,9 | 7.2e-09              |
| GO:0008152 | metabolic process                                    | 26             | 70,3 | 4,00E-07             |
| GO:0009605 | response to external stimulus                        | 7              | 18,9 | 1.2e-06              |
| GO:0044248 | cellular catabolic process                           | 8              | 21,6 | 2.8e-06              |
| GO:0009987 | cellular process                                     | 26             | 70,3 | 2.8e-06              |
| GO:0044249 | cellular biosynthetic process                        | 16             | 43,2 | 2.3e-05              |
| GO:0009058 | biosynthetic process                                 | 16             | 43,2 | 3.7e-05              |
| GO:0050896 | response to stimulus                                 | 14             | 37,8 | 5.7e-05              |
| GO:0009056 | catabolic process                                    | 8              | 21,6 | 0.00014              |
| GO:0044238 | primary metabolic process                            | 20             | 54,1 | 0.00021              |
| GO:0009416 | response to light stimulus                           | 5              | 13,5 | 0.0012               |
| GO:0006950 | response to stress                                   | 9              | 24,3 | 0.0012               |
| GO:0009314 | response to radiation                                | 5              | 13,5 | 0.0013               |
| GO:0009628 | response to abiotic stimulus                         | 7              | 18,9 | 0.0018               |
